# Supplementary material for: Identifying and prioritizing industry-level competitiveness factors: evidence from pharmaceutical market
Source: PubMed Central journal article supplement (PMC4234990; doi:10.1186/2008-2231-22-35), 2014-04-03
Supplement: 2008-2231-22-35-S1.pdf [file 2008-2231-22-35-S1.pdf]

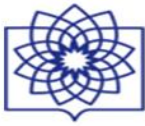

### Pharmaceutical Industry Competitiveness Factors prioritization Questionnaire

This is a research project that is being done by Shahid Beheshti University of Medical Sciences (SBUMS). The purpose of this study is to identify and prioritize key factors that affect competitiveness of pharmaceutical at the industry level. Pharmaceutical industry competitiveness is the ability of the nation's pharmaceutical firms to achieve sustained success against (or compared to) foreign competitors, without protection or subsidies. The nation's firms are those whose headquarters are located in the nation.

**Important notes:**

Please note that no information will be released that might identify anyone and confidentiality of survey respondents is ensured.

If you do not know the answer to a question or if the question does not apply, please leave it blank.

**Biographical Details** (please remember that we will not identify you and that only summary values of respondents will be reported to ensure confidentiality)

Please mention your email address below if you want to receive an electronic version of the results of this research:

**Your Position:** top manager  middle manager  operational manager

**How many years have you worked in pharmaceutical sector:**

less than 1  1 to 5  6 to 10  11 to 20  more than 20

**Which of the following is your major activity in pharmaceutical industry?**

managerial  financial  manufacturing   
Research & Development  Marketing  Human Resources   
Regulatory  Commerce  Quality Control  other: -----

| How would you assess the importance of following factors on competitiveness of pharmaceutical industry | Very low | Low | Neutral | High | Very high |
|--------------------------------------------------------------------------------------------------------|----------|-----|---------|------|-----------|
| 1- Graduates with degrees in sciences relevant to pharmaceutical industry                              |          |     |         |      |           |
| 2- Pharmaceutical expertise employment                                                                 |          |     |         |      |           |
| 3- Pharmaceutical managers' experience in internal and international related area                      |          |     |         |      |           |
| 4- Scientific research publication relevant to pharmaceutical area                                     |          |     |         |      |           |
| 5- Clinical studies                                                                                    |          |     |         |      |           |
| 6- Investment in pharmaceutical high-tech                                                              |          |     |         |      |           |
| 7- GMP structure improving investment in pharmaceutical industry                                       |          |     |         |      |           |
| 8- Investment in pharmaceutical research & development                                                 |          |     |         |      |           |
| 9- Production process sophistication in pharmaceutical area                                            |          |     |         |      |           |
| 10- Using information technology in pharmaceutical industry                                            |          |     |         |      |           |
| 11- Attract capital from market in pharmaceutical industry                                             |          |     |         |      |           |
| 12- Venture capital in pharmaceutical area                                                             |          |     |         |      |           |
| 13- Foreign direct investment in pharmaceutical industry                                               |          |     |         |      |           |
| 14- Pharmaceutical's market approval procedures                                                        |          |     |         |      |           |
| 15- Pharmaceutical regulation                                                                          |          |     |         |      |           |
| 16- Pharmaceutical standards implementation like GMP                                                   |          |     |         |      |           |
| 17- Generic system development                                                                         |          |     |         |      |           |
| 18- Price regulation in pharmaceutical market                                                          |          |     |         |      |           |
| 19- Pharmaceutical intellectual property right                                                         |          |     |         |      |           |
| 20- Pharmaceutical corporation tax                                                                     |          |     |         |      |           |
| 21- Intensity of domestic competition in pharmaceutical market                                         |          |     |         |      |           |
| 22- Mergers and acquisition in pharmaceutical area                                                     |          |     |         |      |           |
| 23- Pharmaceutical import tariff                                                                       |          |     |         |      |           |
| 24- Existence of major pharmaceutical MNCs branches in domestic market                                 |          |     |         |      |           |
| 25- Privatization in pharmaceutical industry                                                           |          |     |         |      |           |
| 26- Availability of latest technologies in pharmaceutical industry                                     |          |     |         |      |           |
| 27- Availability of specialized research and training services in pharmaceutical area                  |          |     |         |      |           |
| 28- Quantity and quality of local supplier in pharmaceutical market                                    |          |     |         |      |           |
| 29- Extent of cluster policy and collaboration inside clusters in pharmaceutical industry              |          |     |         |      |           |
| 30- Extent of marketing in pharmaceutical market                                                       |          |     |         |      |           |
| 31- Quality of drugs                                                                                   |          |     |         |      |           |
| 32- NMEs production in pharmaceutical industry                                                         |          |     |         |      |           |
| 33- Diversification of production in pharmaceutical market                                             |          |     |         |      |           |
| 34- Value chain breadth in pharmaceutical industry                                                     |          |     |         |      |           |
| 35- Degree of customer orientation of pharmaceutical market                                            |          |     |         |      |           |
| 36- Extent of staff training in pharmaceutical industry                                                |          |     |         |      |           |
| 37- Relationship-based recruitment in pharmaceutical area                                              |          |     |         |      |           |
| 38- Frequent changes in pharmaceutical industry at the management level                                |          |     |         |      |           |
| 39- Pharmaceutical companies' joint venture with MNCs                                                  |          |     |         |      |           |
| 40- Pharmaceutical companies' alliance with MNCs                                                       |          |     |         |      |           |
| 41- Breadth of pharmaceutical international market                                                     |          |     |         |      |           |
| 42- Macro policy (export incentives, simplifying customs regulations)                                  |          |     |         |      |           |
| 43- Country's political situation                                                                      |          |     |         |      |           |
| 44- Relations with the countries of the region and the world                                           |          |     |         |      |           |

«Thanks you very much for completing this survey»
